# Supplementary material
Source: Springer Nature journal article supplement (https://www.springermedizin.de/resource/supplementary/12879_2012_2063_MOESM6_ESM.pdf/9443700)

North

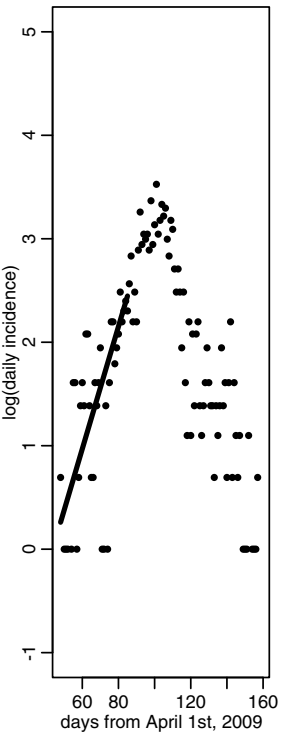

Central

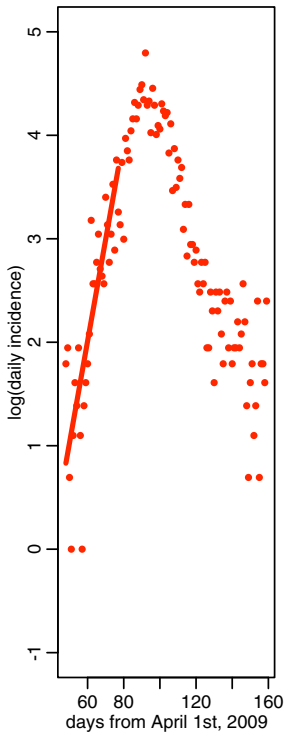

South

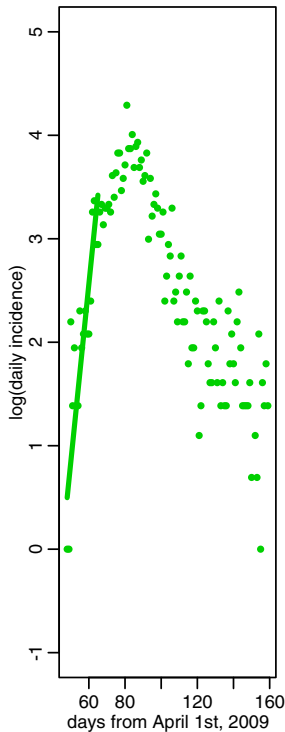

Supplement: MOESM6 [file 9443700]
